# Supplementary material for: Optical design of ZnO-based antireflective layers for enhanced GaAs solar cell performance
Source: Royal Society of Chemistry journal article supplement (doi:10.1039/c5cp06274h), 2015-12-21
Supplement: c5cp06274h1.pdf [file c5cp06274h1.pdf]

## Supporting Information

### Optical Design of ZnO-based Antireflective Layers for Enhanced GaAs Solar Cell Performance

Hye Jin Lee,<sup>a</sup> Jae Won Lee,<sup>a</sup> Hee Jun Kim,<sup>a</sup> Dae-Han Jung,<sup>a</sup> Ki-Suk Lee,<sup>a</sup> Sang Hyeon Kim,<sup>b</sup> Dae-myong Geum,<sup>b</sup> Chang Zoo Kim,<sup>c</sup> Won Jun Choi,<sup>b\*</sup> and Jeong Min Baik<sup>a\*</sup>

<sup>a</sup> School of Materials Science and Engineering, KIST-UNIST-Ulsan Center for Convergent Materials, Ulsan National Institute of Science and Technology (UNIST), Ulsan 689-798, Republic of Korea.

<sup>b</sup> Center for Opto-Electronic Materials and Devices, Korea Institute of Science and Technology, Seoul, 136-791, Korea

<sup>c</sup> Nano Process Division Korea Advanced Nano Fab Center Gyeonggi-do 443-270, Korea

\* Corresponding author

\* To whom correspondence should be addressed. E-mail: [wjchoi@kist.re.kr](mailto:wjchoi@kist.re.kr), [jbaik@unist.ac.kr](mailto:jbaik@unist.ac.kr)

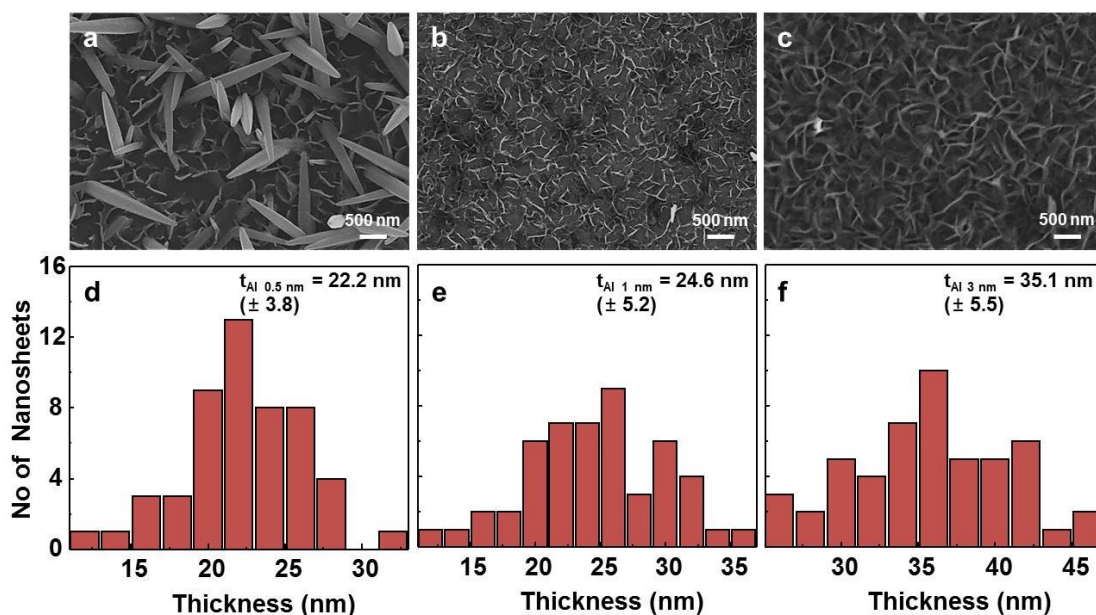

**Fig. S1** Top view of SEM image for ZnO nanosheet/Al/ZnS with thickness of Al (a) 0.5 nm, (b) 1 nm, (c) 3 nm and (d-f) histogram of the thickness distributions of the nanosheets with Al thickness, respectively.

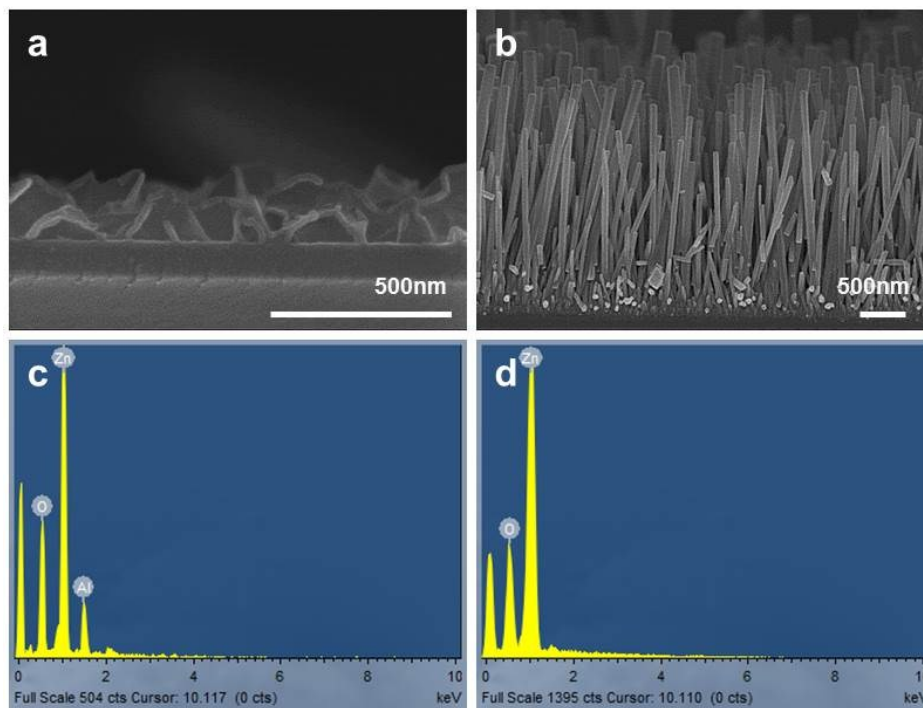

**Fig. S2** Scanning electron micrographs of (a) ZnO nanosheets and (b) ZnO nanowires grown on Si substrates. The corresponding EDXS results are also shown in (c) and (d), respectively.

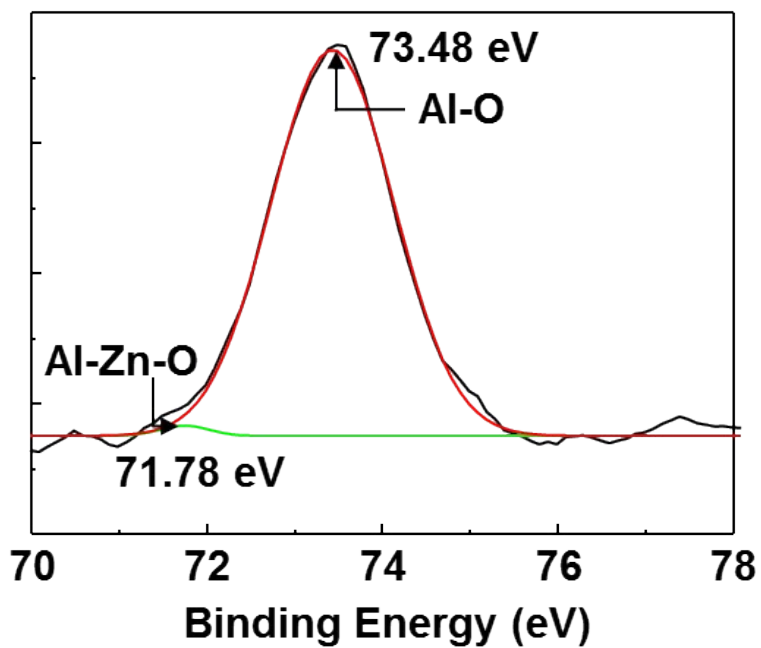

**Fig. S3** The peak in the Al 2p spectra corresponds to Al-O and Al-Zn-O bonds. The Al-O binding energy was observed at 73.48 eV, lower than that ( $\sim 75.6$  eV) of the pure  $\text{Al}_2\text{O}_3$ .

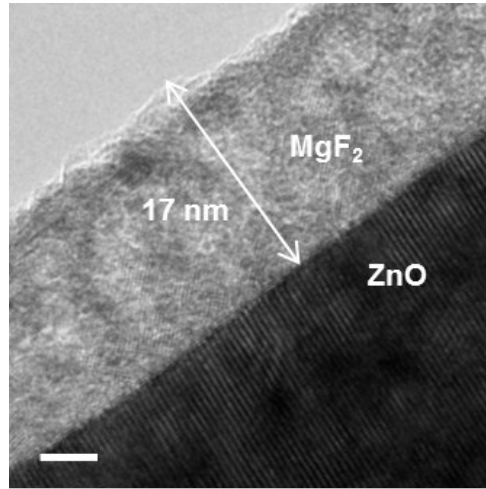

**Fig. S4** Transmission electron microscopy (TEM) images of  $\text{MgF}_2$  thickness on  $\text{MgF}_2/\text{ZnO}$  nanowires (scale bar is 5 nm).

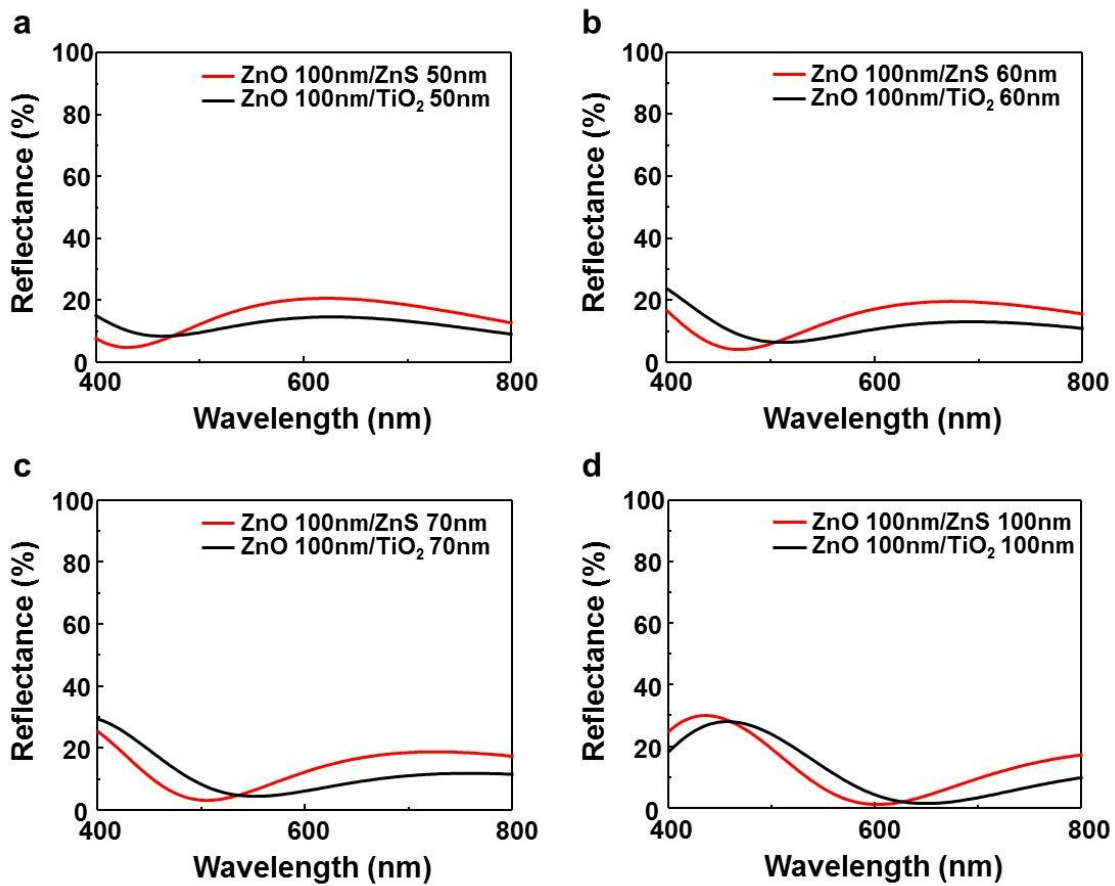

**Fig. S5** Simulated reflectance spectra for the  $\text{ZnO}/\text{TiO}_2$  and  $\text{ZnO}/\text{ZnS}$  double layered films with

different thickness. The thickness is ZnO 100nm, TiO<sub>2</sub> (or ZnS) (a) 50 nm, (b) 60 nm, (c) 70 nm and (d) 100 nm.
